# Supplementary material for: Self-assembled Collagen-Fibrin Hydrogel Reinforces Tissue Engineered Adventitia Vessels Seeded with Human Fibroblasts
Source: PubMed Central journal article supplement (PMC5818609; doi:10.1038/s41598-018-21681-7), 2018-02-19
Supplement: 41598_2018_21681_MOESM1_ESM.pdf [file 41598_2018_21681_MOESM1_ESM.pdf]

**Self-assembled Collagen-Fibrin Hydrogel Reinforces Tissue Engineered Adventitia  
Vessels Seeded with Human Fibroblasts**

**Bijal Patel<sup>1</sup>, Zhengfan Xu<sup>1</sup>, Cameron B. Pinnock<sup>1</sup>, Loay S. Kabbani<sup>2</sup>, Mai T. Lam<sup>1,3,\*</sup>**

<sup>1</sup>Department of Biomedical Engineering, Wayne State University, Detroit, MI

<sup>2</sup>Department of Vascular Surgery, Henry Ford Health System, Detroit, MI

<sup>3</sup>Cardiovascular Research Institute, Wayne State University, Detroit, MI

Addresses:

Bijal Patel, M.S.E.  
Wayne State University  
818 W. Hancock Street  
Detroit, MI 48201 USA  
bijal.patel3@wayne.edu

Zhengfan Xu, M.D.  
Wayne State University  
818 W. Hancock Street  
Detroit, MI 48201 USA  
fc8031@wayne.edu

Cameron B. Pinnock, M.S.E.  
Wayne State University  
818 W. Hancock Street  
Detroit, MI 48201 USA  
dw7722@wayne.edu

Loay Kabbani, M.D.  
2799 W Grand Blvd  
Detroit, MI 48202 USA  
LKABBAN1@hfhs.org

Corresponding author:

Mai T. Lam, Ph.D.  
Wayne State University  
818 W. Hancock Street  
Detroit, MI 48201 USA  
mtlam@wayne.edu  
Phone: (313) 577-0118  
Fax: (313) 577-8333

**Supplementary Figure S1 | Vessel undergoing hemodynamic testing in the custom-built perfusion system. Scale bar = 10 cm.**

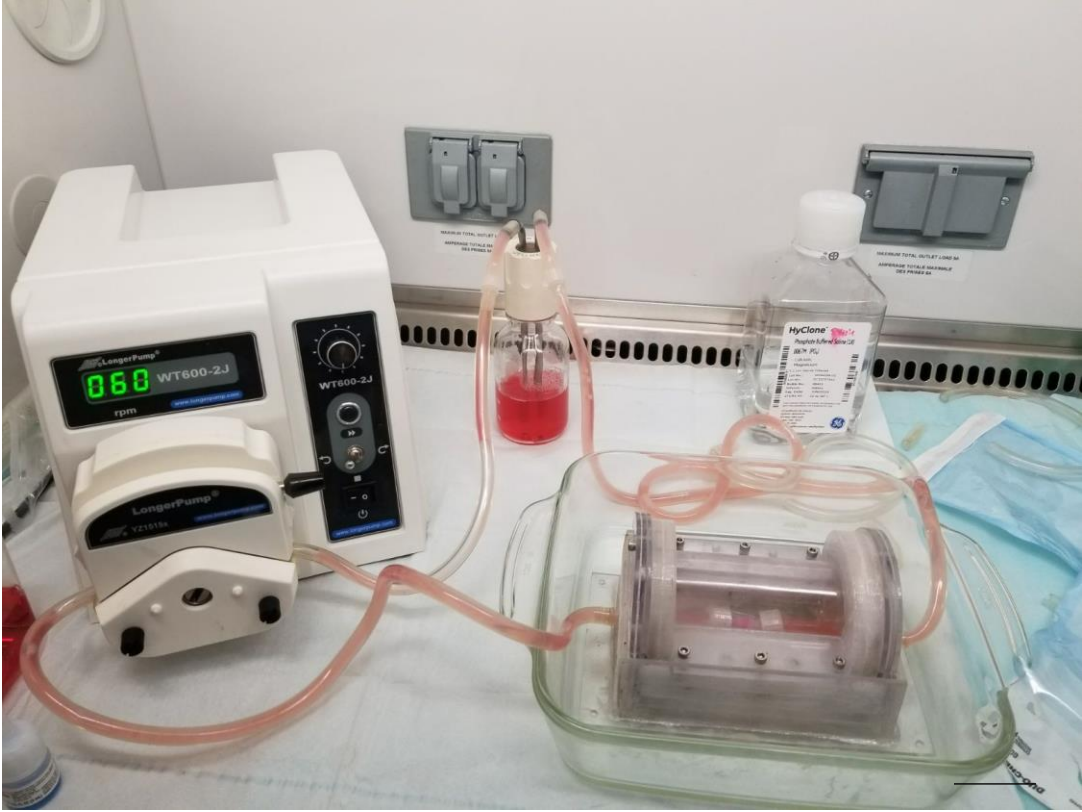

**Supplementary Figure S2 | Negative CD45 stain indicates no presence of adhered leukocytes to the adventitia rings.** Inside the tissue rings, **a**, fibroblast cells stained positive for DAPI, and **b**, CD45 leukocyte stain was negative. Outside the tissue ring, **c**, DAPI and **d**, CD45 stains were positive for the leukocytes. *L* = lumen. Scale bars = 100  $\mu$ m.

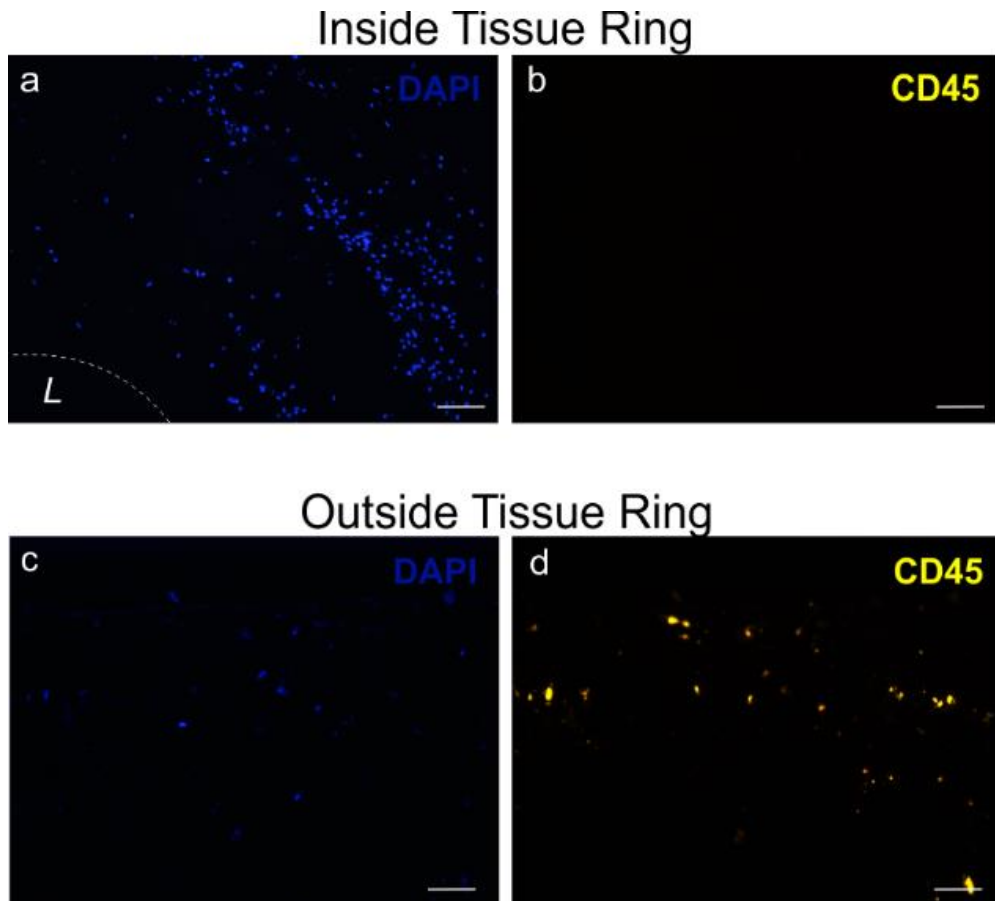

**Supplementary Tables 1-4 | Statistics for tensile properties of adventitia rings with different cytokine stimulation regimens.**

| Cytokine Group    | Tensile Properties ANOVA |                                 |                       |
|-------------------|--------------------------|---------------------------------|-----------------------|
|                   | Elastic Modulus (E)      | Ultimate Tensile Strength (UTS) | Failure Strength (FS) |
| F Value           | 31.9                     | 348                             | 99.7                  |
| DF between groups | 2                        | 2                               | 2                     |
| DF within groups  | 9                        | 9                               | 9                     |
| P Value           | $8.30 \times 10^{-5}$    | $2.99 \times 10^{-9}$           | $7.22 \times 10^{-7}$ |

| Cytokine Group        | Tensile Properties ANOVA P Values E |                       |                       |
|-----------------------|-------------------------------------|-----------------------|-----------------------|
|                       | ascorbic acid → TGF-β               | TGF-β → ascorbic acid | ascorbic acid + TGF-β |
| ascorbic acid → TGF-β |                                     | $7.49 \times 10^{-3}$ | $6.00 \times 10^{-5}$ |
| TGF-β → ascorbic acid | $7.49 \times 10^{-3}$               |                       | $8.49 \times 10^{-3}$ |
| ascorbic acid + TGF-β | $6.00 \times 10^{-5}$               | $8.49 \times 10^{-3}$ |                       |

| Cytokine Group        | Tensile Properties ANOVA P Values UTS |                       |                       |
|-----------------------|---------------------------------------|-----------------------|-----------------------|
|                       | ascorbic acid → TGF-β                 | TGF-β → ascorbic acid | ascorbic acid + TGF-β |
| ascorbic acid → TGF-β |                                       | $2.78 \times 10^{-7}$ | $2.66 \times 10^{-8}$ |
| TGF-β → ascorbic acid | $2.78 \times 10^{-7}$                 |                       | $4.00 \times 10^{-6}$ |
| ascorbic acid + TGF-β | $2.66 \times 10^{-8}$                 | $4.00 \times 10^{-6}$ |                       |

| Cytokine Group        | Tensile Properties ANOVA P Values FS |                       |                       |
|-----------------------|--------------------------------------|-----------------------|-----------------------|
|                       | ascorbic acid → TGF-β                | TGF-β → ascorbic acid | ascorbic acid + TGF-β |
| ascorbic acid → TGF-β |                                      | $3.40 \times 10^{-5}$ | $5.66 \times 10^{-7}$ |
| TGF-β → ascorbic acid | $3.40 \times 10^{-5}$                |                       | $1.06 \times 10^{-3}$ |
| ascorbic acid + TGF-β | $5.66 \times 10^{-7}$                | $1.06 \times 10^{-3}$ |                       |

**Supplementary Tables 5-8 | Statistics for tensile properties of adventitia rings with varying hydrogel content. Groups were defined in terms of collagen (COL) gel concentration in a base fibrin gel.**

| Hydrogel Ring Group | Tensile Properties ANOVA |                                 |                       |
|---------------------|--------------------------|---------------------------------|-----------------------|
|                     | Elastic Modulus (E)      | Ultimate Tensile Strength (UTS) | Failure Strength (FS) |
| F Value             | 4.68                     | 13.8                            | 8.43                  |
| DF between groups   | 3                        | 3                               | 3                     |
| DF within groups    | 49                       | 49                              | 49                    |
| P Value             | $5.94 \times 10^{-3}$    | $1.00 \times 10^{-6}$           | $1.28 \times 10^{-4}$ |

| Hydrogel Ring Group | Tensile Properties ANOVA P Values E |               |               |               |
|---------------------|-------------------------------------|---------------|---------------|---------------|
|                     | Fibrin only COL                     | 0.7 mg/ml COL | 1.7 mg/ml COL | 2.2 mg/ml COL |
| Fibrin only COL     |                                     | 0.0479        | 0.0276        | 0.928         |
| 0.7 mg/ml COL       | 0.0479                              |               | 0.966         | 0.140         |
| 1.7 mg/ml COL       | 0.0276                              | 0.966         |               | 0.0874        |
| 2.2 mg/ml COL       | 0.928                               | 0.140         | 0.0874        |               |

| Hydrogel Ring Group | Tensile Properties ANOVA P Values UTS |                       |                       |                       |
|---------------------|---------------------------------------|-----------------------|-----------------------|-----------------------|
|                     | Fibrin only COL                       | 0.7 mg/ml COL         | 1.7 mg/ml COL         | 2.2 mg/ml COL         |
| Fibrin only COL     |                                       | 0.0150                | 0.0766                | $8.26 \times 10^{-3}$ |
| 0.7 mg/ml COL       | 0.0150                                |                       | $2.80 \times 10^{-5}$ | $2.60 \times 10^{-5}$ |
| 1.7 mg/ml COL       | 0.0766                                | $2.80 \times 10^{-5}$ |                       | 0.382                 |
| 2.2 mg/ml COL       | $8.26 \times 10^{-3}$                 | $2.60 \times 10^{-5}$ | 0.382                 |                       |

| Hydrogel Ring Group | Tensile Properties ANOVA P Values FS |                       |                       |                       |
|---------------------|--------------------------------------|-----------------------|-----------------------|-----------------------|
|                     | Fibrin only COL                      | 0.7 mg/ml COL         | 1.7 mg/ml COL         | 2.2 mg/ml COL         |
| Fibrin only COL     |                                      | 0.991                 | $4.05 \times 10^{-3}$ | $9.64 \times 10^{-3}$ |
| 0.7 mg/ml COL       | 0.991                                |                       | $2.64 \times 10^{-3}$ | $6.74 \times 10^{-3}$ |
| 1.7 mg/ml COL       | $4.05 \times 10^{-3}$                | $2.64 \times 10^{-3}$ |                       | 0.830                 |
| 2.2 mg/ml COL       | $9.64 \times 10^{-3}$                | $6.74 \times 10^{-3}$ | 0.830                 |                       |

**Supplementary Tables 9-12 | Statistics for circumferential tensile properties of adventitia vessels cultured for 1 day, 1 week and 2 week periods.**

| Hydrogel vessel Group | Tensile Properties ANOVA |                                 |                       |
|-----------------------|--------------------------|---------------------------------|-----------------------|
|                       | Elastic Modulus (E)      | Ultimate Tensile Strength (UTS) | Failure Strength (FS) |
| F Value               | 4.38                     | 0.505                           | 6.18                  |
| DF between groups     | 5                        | 5                               | 5                     |
| DF within groups      | 18                       | 18                              | 18                    |
| P Value               | $8.78 \times 10^{-3}$    | 0.768                           | $1.68 \times 10^{-3}$ |

| Hydrogel vessel Group   | Tensile Properties ANOVA P Values E |                       |                        |                      |                        |                      |
|-------------------------|-------------------------------------|-----------------------|------------------------|----------------------|------------------------|----------------------|
|                         | Fibrin only COL – 1 day             | 0.7 mg/ml COL – 1 day | Fibrin only COL – 1 wk | 0.7 mg/ml COL – 1 wk | Fibrin only COL – 2 wk | 0.7 mg/ml COL – 2 wk |
| Fibrin only COL – 1 day |                                     | 0.0685                | 0.108                  | 0.330                | 0.528                  | 0.225                |
| 0.7 mg/ml COL – 1 day   | 0.0685                              |                       | 0.00115                | 0.00657              | 0.116                  | 0.425                |
| Fibrin only COL – 1 wk  | 0.108                               | 0.00115               |                        | 0.492                | 0.242                  | 0.00424              |
| 0.7 mg/ml COL – 1 wk    | 0.330                               | 0.00657               | 0.492                  |                      | 0.666                  | 0.0254               |
| Fibrin only COL – 2 wk  | 0.528                               | 0.0116                | 0.242                  | 0.666                |                        | 0.0471               |
| 0.7 mg/ml COL – 2 wk    | 0.225                               | 0.425                 | 0.0424                 | 0.0254               | 0.0471                 |                      |

| Hydrogel vessel Group   | Tensile Properties ANOVA P Values UTS |                       |                        |                      |                        |                      |
|-------------------------|---------------------------------------|-----------------------|------------------------|----------------------|------------------------|----------------------|
|                         | Fibrin only COL – 1 day               | 0.7 mg/ml COL – 1 day | Fibrin only COL – 1 wk | 0.7 mg/ml COL – 1 wk | Fibrin only COL – 2 wk | 0.7 mg/ml COL – 2 wk |
| Fibrin only COL – 1 day |                                       | 0.547                 | 0.840                  | 0.775                | 0.755                  | 0.476                |
| 0.7 mg/ml COL – 1 day   | 0.547                                 |                       | 0.384                  | 0.356                | 0.329                  | 0.944                |
| Fibrin only COL – 1 wk  | 0.840                                 | 0.384                 |                        | 0.916                | 0.899                  | 0.307                |
| 0.7 mg/ml COL – 1 wk    | 0.775                                 | 0.356                 | 0.916                  |                      | 0.989                  | 0.286                |
| Fibrin only COL – 2 wk  | 0.755                                 | 0.329                 | 0.899                  | 0.989                |                        | 0.256                |
| 0.7 mg/ml COL – 2 wk    | 0.476                                 | 0.944                 | 0.307                  | 0.286                | 0.256                  |                      |

| Hydrogel vessel Group   | Tensile Properties ANOVA P Values FS |                       |                        |                      |                        |                      |
|-------------------------|--------------------------------------|-----------------------|------------------------|----------------------|------------------------|----------------------|
|                         | Fibrin only COL – 1 day              | 0.7 mg/ml COL – 1 day | Fibrin only COL – 1 wk | 0.7 mg/ml COL – 1 wk | Fibrin only COL – 2 wk | 0.7 mg/ml COL – 2 wk |
| Fibrin only COL – 1 day |                                      | 0.893                 | 0.00563                | 0.00160              | 0.00134                | 0.0323               |
| 0.7 mg/ml COL – 1 day   | 0.893                                |                       | 0.00403                | 0.00116              | 0.000954               | 0.0239               |
| Fibrin only COL – 1 wk  | 0.00563                              | 0.00403               |                        | 0.432                | 0.464                  | 0.446                |
| 0.7 mg/ml COL – 1 wk    | 0.00160                              | 0.00116               | 0.432                  |                      | 0.922                  | 0.150                |
| Fibrin only COL – 2 wk  | 0.00134                              | 0.000954              | 0.464                  | 0.922                |                        | 0.155                |
| 0.7 mg/ml COL – 2 wk    | 0.0323                               | 0.0239                | 0.446                  | 0.150                | 0.155                  |                      |

**Supplementary Table 13 | Longitudinal tensile properties of adventitia vessels cultured for a 2 week period**

| Hydrogel Ring Group | Longitudinal Tensile Properties Two Tailed T test |                                 |                       |
|---------------------|---------------------------------------------------|---------------------------------|-----------------------|
|                     | Elastic Modulus (E)                               | Ultimate Tensile Strength (UTS) | Failure Strength (FS) |
| DF                  | 4                                                 | 4                               | 4                     |
| t                   | 0.679                                             | -0.167                          | 0.130                 |
| P Value             | 0.057                                             | 0.608                           | 0.132                 |

**Supplementary Table 14 | Statistics for collagen content quantification for fibrin only collagen and 0.7 mg/ml collagen rings.**

| Hydrogel Ring Group | Collagen Content (% area) Two Tailed T test |                         |
|---------------------|---------------------------------------------|-------------------------|
|                     | Trichrome                                   | Picrosirius red         |
| DF                  | 12                                          | 107                     |
| t                   | -4.79                                       | -5.53                   |
| P Value             | 4.38 x 10 <sup>-4</sup>                     | 2.29 x 10 <sup>-7</sup> |

**Supplementary Table 15 | Collagen type quantification for fibrin only collagen and 0.7 mg/ml collagen rings.**

| Hydrogel Ring Group | Collagen Type (% of total collagen) - Two tailed t test |        |                      |
|---------------------|---------------------------------------------------------|--------|----------------------|
|                     | Green<br>(less mature)                                  | Yellow | Red<br>(more mature) |
| DF                  | 17                                                      | 17     | 17                   |
| t                   | 1.59                                                    | 1.31   | -2.11                |
| P Value             | 0.130                                                   | 0.209  | 0.0498               |
